# Supplementary material
Source: Royal Society of Chemistry journal article supplement (doi:10.1039/d6cp00500d)
Supplement: d6cp00500d1.pdf [file d6cp00500d1.pdf]

## Supplementary information

### Strong field ionization and dissociation dynamics of vinyl bromide ( $C_2H_3Br$ ) initiated by few-cycle pulses

Temitayo A. Olowolafe, Godfred Boakye Adusei, Deep Mukherjee, Andrew S Durden, Sulaiman Abubakar, Blessed Oguh, Akaninyene Udoikono, Suk Kyoung Lee, H Bernhard Schlegel, and Wen Li\*

Department of Chemistry, Wayne State University, Detroit, MI, 48202, United States

[wli@chem.wayne.edu](mailto:wli@chem.wayne.edu)

#### 1. Computed relative energies of vinyl bromide cationic states

Tables S1–S3 summarize the relative energies of the monocation, singlet dication, and triplet dication computed at the B3LYP/6-311++G(3d,2p), CCSD/cc-pVTZ, and CBS-QB3 levels of theory.

Table S1. Monocation fragment system enthalpies at 0 K (in eV)

| System 0K Enthalpy (eV)                    | B3LYP/6-311++g(3d,2p) | CCSD/cc-pVTZ | CBS-QB3 |
|--------------------------------------------|-----------------------|--------------|---------|
| $C_2H_3Br^+$ D0 Vertical (S0 Neutral Geom) | 0.00                  | 0.00         | 0.00    |
| $Br^+$ S0, $C_2H_3$ D0                     | 7.50                  | 6.75         | 6.78    |
| $Br^+$ T0, $C_2H_3$ D0                     | 5.66                  | 5.13         | 5.46    |
| Br D0, $C_2H_3^+$ S0                       | 2.38                  | 2.10         | 2.25    |
| HBr S0, $C_2H_2^+$ D0                      | 2.80                  | 2.43         | 2.59    |
| HBr T0, $C_2H_2^+$ D0                      | 6.62                  | 6.22         | 6.48    |
| $C_2H_2Br^+$ S0, H radical                 | 3.11                  | 2.78         | 2.74    |
| $C_2H_2Br^+$ T0, H radical                 | 4.70                  | 4.47         | 4.57    |
| CBr D0, $CH_3^+$ S0                        | 5.88                  | 5.48         | 5.65    |
| CBr D0, $CH_3^+$ T0                        | 9.29                  | 9.00         | 9.47    |
| CBr <sup>+</sup> S0, $CH_3$ D0             | 4.91                  | 4.45         | 4.53    |
| CBr <sup>+</sup> T0, $CH_3$ D0             | 7.59                  | 7.10         | 7.38    |
| $CH_2$ S0, CHBr <sup>+</sup> D0            | 9.11                  | 8.59         | 8.91    |
| $CH_2$ T0, CHBr <sup>+</sup> D0            | 8.64                  | 8.12         | 8.57    |
| $CH_2^+$ D0, CHBr T0                       | 10.48                 | 9.88         | 10.57   |

Table S2. Singlet dication fragment system enthalpies at 0 K. Intermediates are labeled as “int” and the transition states between systems A and B are denoted as “TS: A→B”.

| System 0K Enthalpy (eV)                                                                                                   | B3LYP/6-311++g(3d,2p) | CCSD/cc-pVTZ | CBS-QB3 |
|---------------------------------------------------------------------------------------------------------------------------|-----------------------|--------------|---------|
| C <sub>2</sub> H <sub>3</sub> Br <sup>+2</sup> S0 Vertical (S0 Neutral Geom)                                              | 0.00                  | 0.00         | 0.00    |
| TS: C <sub>2</sub> H <sub>3</sub> Br <sup>+2</sup> S0 → C <sub>2</sub> H <sub>3</sub> <sup>+</sup> S0, Br <sup>+</sup> S0 | 1.66                  | 1.74         | 1.57    |
| Br <sup>+</sup> S0, C <sub>2</sub> H <sub>3</sub> <sup>+</sup> S0                                                         | -1.48                 | -1.90        | -1.81   |
| TS: C <sub>2</sub> H <sub>3</sub> Br <sup>+2</sup> S0 → Int CH <sub>3</sub> -CBr <sup>+2</sup> S0                         | -0.92                 | -0.76        | -0.77   |
| Int CH <sub>3</sub> -CBr <sup>+2</sup> S0                                                                                 | 1.38                  | 1.68         | 1.88    |
| TS: Int CH <sub>3</sub> -CBr <sup>+2</sup> S0 → CBr <sup>+</sup> S0, CH <sub>3</sub> <sup>+</sup> S0                      | 0.31                  | 0.18         | 0.24    |
| CBr <sup>+</sup> S0, CH <sub>3</sub> <sup>+</sup> S0                                                                      | -2.81                 | -3.07        | -2.94   |
| C <sub>2</sub> H <sub>2</sub> Br <sup>+</sup> S0, H <sup>+</sup>                                                          | -0.95                 | -0.83        | -0.92   |

Table S3. Triplet dication fragment system enthalpies at 0 K. Intermediates are labeled as “int” and the transition states between systems A and B are denoted as “TS: A→B”.

| System                                                                                                                    | B3LYP/6-311++g(3d,2p) | CCSD/cc-pVTZ | CBS-QB3 |
|---------------------------------------------------------------------------------------------------------------------------|-----------------------|--------------|---------|
| C <sub>2</sub> H <sub>3</sub> Br <sup>+2</sup> T0 Vertical (S0 Neutral Geom)                                              | 0.00                  | 0.00         | 0.00    |
| TS: C <sub>2</sub> H <sub>3</sub> Br <sup>+2</sup> T0 → Br <sup>+</sup> T0, C <sub>2</sub> H <sub>3</sub> <sup>+</sup> S0 | 0.58                  | 0.75         | 0.61    |
| Br <sup>+</sup> T0, C <sub>2</sub> H <sub>3</sub> <sup>+</sup> S0                                                         | -3.26                 | -3.59        | -3.48   |
| TS: C <sub>2</sub> H <sub>3</sub> Br <sup>+2</sup> T0 → Int CH <sub>3</sub> -CBr <sup>+2</sup> T0                         | 1.51                  | 1.60         | 1.51    |
| Int CH <sub>3</sub> -CBr <sup>+2</sup> T0                                                                                 | -1.65                 | -1.49        | -1.84   |
| TS: Int CH <sub>3</sub> -CBr <sup>+2</sup> T0 → CBr <sup>+</sup> T0, CH <sub>3</sub> <sup>+</sup> S0                      | 1.51                  | 1.60         | 1.51    |
| CBr <sup>+</sup> S0, CH <sub>3</sub> <sup>+</sup> T0                                                                      | 0.66                  | 0.39         | 0.54    |
| CH <sub>2</sub> <sup>+</sup> D0, CHBr <sup>+</sup> D0                                                                     | 1.44                  | 1.09         | 1.29    |
| HBr <sup>+</sup> D0, C <sub>2</sub> H <sub>2</sub> <sup>+</sup> D0                                                        | -3.01                 | -3.27        | -3.16   |
| CHBr <sup>+</sup> D0, CH <sub>2</sub> <sup>+</sup> D0                                                                     | 1.44                  | 1.09         | 1.29    |
| CBr <sup>+</sup> S0, H, CH <sub>2</sub> <sup>+</sup> D0                                                                   | 2.47                  | 2.04         | 2.01    |

The relative energies (eV) of the low-lying electronic states of the vinyl bromide dication, calculated at the ground-state geometry of neutral vinyl bromide, are summarized in Tables S4–S5. Ionization potentials from the neutral species are also included. The dominant configuration of each state is represented using the following notation: ‘**2**’ denotes a doubly occupied orbital, ‘**u**’ and ‘**d**’ indicate singly occupied orbitals with up- or down-spin electrons, respectively, and ‘**0**’ denotes an unoccupied orbital.

Table S4. The relative energies (eV) at the single state of vinyl bromide dication.

| State          | Dominant Configuration | CASSCF | CASPT2 | EOMCC |
|----------------|------------------------|--------|--------|-------|
| S <sub>0</sub> | 222200                 | 0.96   | 0.96   | 0.96  |
| S <sub>1</sub> | 222ud0                 | 1.55   | 1.40   | 1.50  |
| S <sub>2</sub> | 2u22d0                 | 4.63   | 3.83   | 2.27  |
| S <sub>3</sub> | 2u2d20                 | 5.19   | 4.38   | 4.66  |
| S <sub>4</sub> | 222020                 | 5.42   | 4.71   | 6.36  |
| S <sub>5</sub> | 22ud20                 | 5.84   | 4.95   | 7.71  |

Table S5. The relative energies (eV) at the triplet state of vinyl bromide dication.

| State          | Dominant Configuration | CASSCF | CASPT2 | EOMCC |
|----------------|------------------------|--------|--------|-------|
| T <sub>0</sub> | 22u2u0                 | 1.29   | 1.29   | 1.29  |
| T <sub>1</sub> | 2u22u0                 | 2.08   | 2.18   | 1.91  |
| T <sub>2</sub> | 222uu0                 | 4.03   | 3.53   | 2.78  |
| T <sub>3</sub> | 22uu20                 | 4.68   | 4.17   | 4.95  |
| T <sub>4</sub> | 2uu220                 | 4.78   | 4.23   | 5.01  |
| T <sub>5</sub> | 2u2u20                 | 6.11   | 5.37   | 5.33  |

## 2. Vibrational frequencies of Key Intermediates and Transition States in the Reaction Pathway

The vibrational frequencies (cm<sup>-1</sup>) of Int<sub>1</sub> and TS<sub>6</sub>, computed at the B3LYP/6-311++G(3d,2p), CBS-QB3, and CCSD/cc-pVTZ levels of theory, are presented in Tables S6 and S7.

Table S6. Vibrational frequencies of Int<sub>1</sub>

| Vibrational Frequency (cm <sup>-1</sup> ) | B3LYP/6-311++G(3d,2p) | CBS-QB3 | CCSD/cc-pVTZ |
|-------------------------------------------|-----------------------|---------|--------------|
| V1                                        | 328.8                 | 326.7   | 332.4        |
| V2                                        | 329.1                 | 326.7   | 332.4        |
| V3                                        | 660.5                 | 662.6   | 670.3        |
| V4                                        | 813.5                 | 808.7   | 827.7        |
| V5                                        | 814.4                 | 809.0   | 827.7        |
| V6                                        | 1185.3                | 1174.2  | 1235.7       |

|     |        |        |        |
|-----|--------|--------|--------|
| V7  | 1185.3 | 1174.3 | 1235.7 |
| V8  | 1241.6 | 1234.1 | 1267.5 |
| V9  | 1529.9 | 1540.2 | 1497.3 |
| V10 | 2762.4 | 2759.4 | 2830.1 |
| V11 | 2788.6 | 2790.6 | 2893.0 |
| V12 | 2791.2 | 2791.4 | 2893.0 |

Table S7. Vibrational frequencies of TS<sub>6</sub>

| Vibrational Frequency (cm <sup>-1</sup> ) | B3LYP/6-311++G(3d,2p) | CBS-QB3 | CCSD/cc-pVTZ |
|-------------------------------------------|-----------------------|---------|--------------|
| V1                                        | -145.7                | -139.1  | -168.0       |
| V2                                        | 155.9                 | 152.2   | 169.7        |
| V3                                        | 156.0                 | 152.3   | 169.7        |
| V4                                        | 470.4                 | 440.1   | 573.0        |
| V5                                        | 470.7                 | 440.4   | 573.4        |
| V6                                        | 1046.5                | 1047.8  | 1105.3       |
| V7                                        | 1377.1                | 1366.5  | 1388.9       |
| V8                                        | 1407.3                | 1396.8  | 1434.0       |
| V9                                        | 1407.9                | 1397.4  | 1434.0       |
| V10                                       | 3019.7                | 3041.4  | 3049.8       |
| V11                                       | 3215.1                | 3242.7  | 3249.9       |
| V12                                       | 3215.4                | 3243.0  | 3249.9       |
